# Supplementary material for: Direct synthesis of ultralight, elastic, high-temperature insulation N-doped TiO2 ceramic nanofibrous sponges via conjugate electrospinning
Source: Royal Society of Chemistry journal article supplement (doi:10.1039/d3nr04987f), 2023-11-18
Supplement: d3nr04987f4.pdf [file d3nr04987f4.pdf]

## Supplementary information

### Direct synthesis of ultralight, elastic, high-temperature insulation N-doped TiO<sub>2</sub> ceramic nanofibrous sponges via electrospinning

Wei Cheng<sup>1</sup>, Wenling Jiao<sup>1\*</sup>, Yifan Fei<sup>1</sup>, Zaihui Yang<sup>1</sup>, Xiaohua Zhang<sup>1</sup>, Fan Wu<sup>1</sup>, Yitao Liu<sup>1</sup>, Xia Yin<sup>1\*</sup> and Bin Ding<sup>1</sup>

<sup>1</sup> Key Laboratory of Textile Science & Technology (Ministry of Education), College of Textiles and Innovation Center for Textile Science and Technology, Donghua University, Shanghai 201620, China

\* Correspondence: [wenlingjiao@dhu.edu.cn](mailto:wenlingjiao@dhu.edu.cn), [xyin@dhu.edu.cn](mailto:xyin@dhu.edu.cn)

#### Supplementary Movies

**Movie S1** Spinning and stacking processes

**Movie S2** Dynamic compression recovery process

**Movie S3** Burning process of N-TiO<sub>2</sub> CNSs at alcohol blowtorch

#### Supplementary Figures

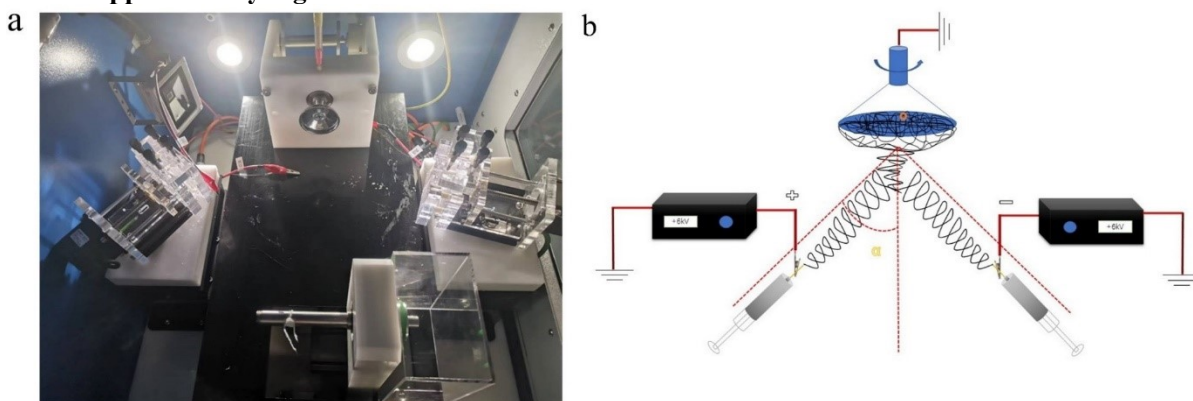

Figure S1. Schematic diagram of conjugate electrospinning. (a) A physical picture. (b) A mechanism image

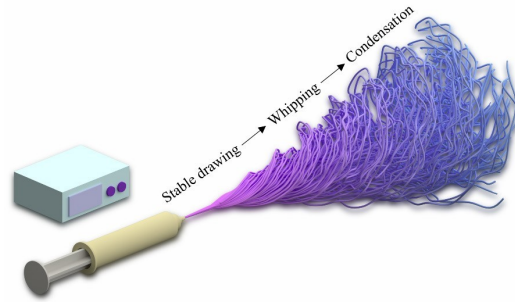

**Figure S2.** Different regions of the Taylor cone in electrospinning

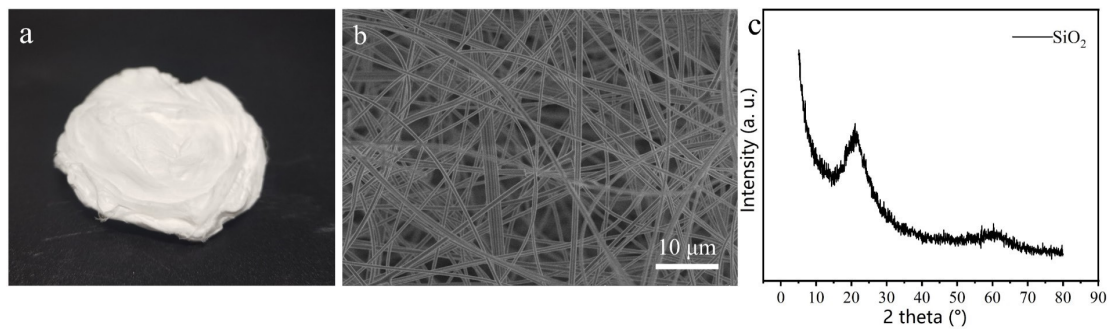

**Figure S3.** Structural characterization of SiO<sub>2</sub> nanofibrous sponges. (a) Physical picture of a SiO<sub>2</sub> nanofibrous sponge. (b) SEM image of SiO<sub>2</sub> nanofibers. (c) XRD data of SiO<sub>2</sub> nanofibers.

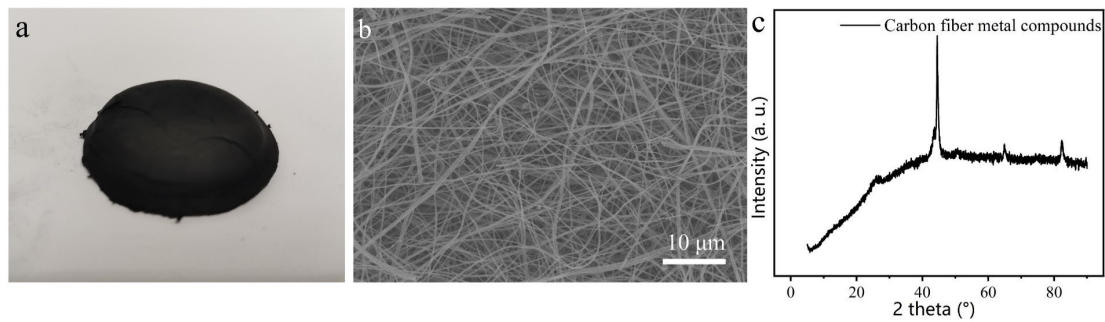

**Figure S4.** Structural characterization of carbon fiber metal compounds nanofibrous sponges. (a) Physical picture of a carbon nanofibrous sponge (b) SEM image of carbon nanofibers. (c) XRD data of carbon nanofibers

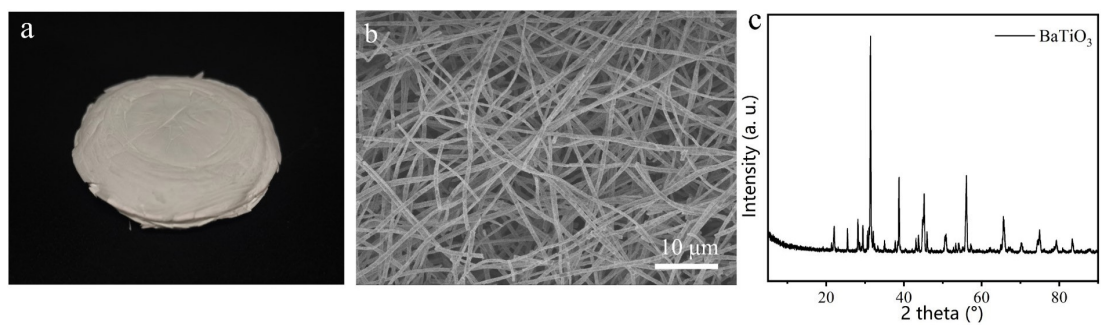

**Figure S5.** Structural characterization of TiBaO<sub>3</sub> nanofibrous sponges. (a) Physical picture of a TiBaO<sub>3</sub> nanofibrous sponge (b) SEM image of TiBaO<sub>3</sub> nanofibers. (c) XRD data of TiBaO<sub>3</sub> nanofibers.

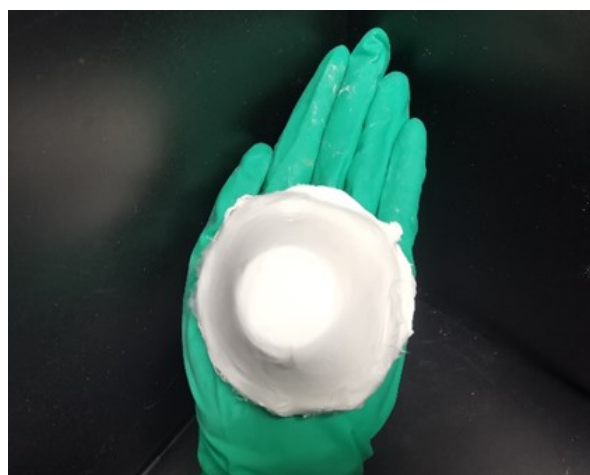

**Figure S6.** The precursor of N-TiO<sub>2</sub> CNSs with a diameter of 7.5 cm and a thickness of 3.5 cm.

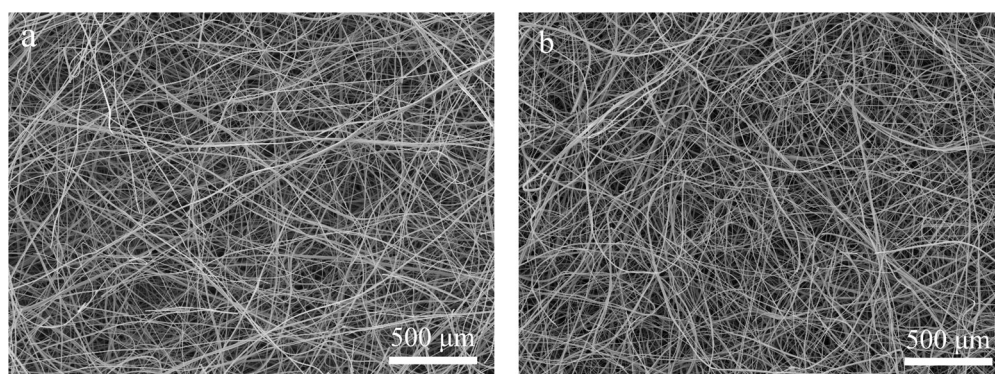

**Figure S7.** (a) SEM image of the surface lamellar of N-TiO<sub>2</sub> CNSs. (b) SEM image of the inner layer of N-TiO<sub>2</sub> CNSs.

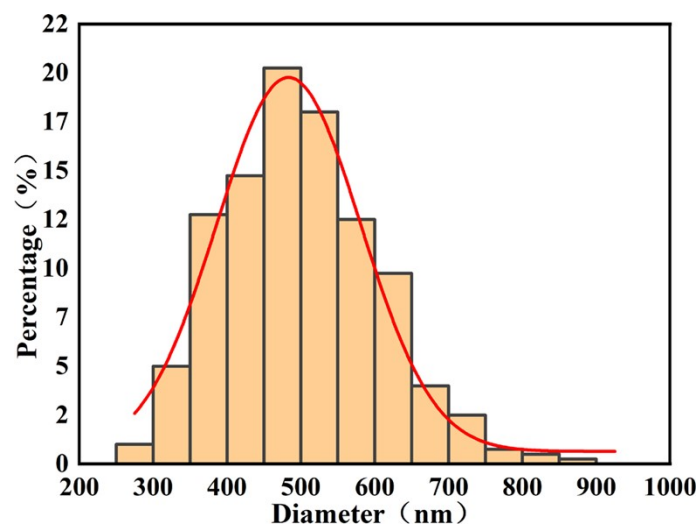

**Figure S8.** The fiber diameter distribution in the surface layer of the sponge.

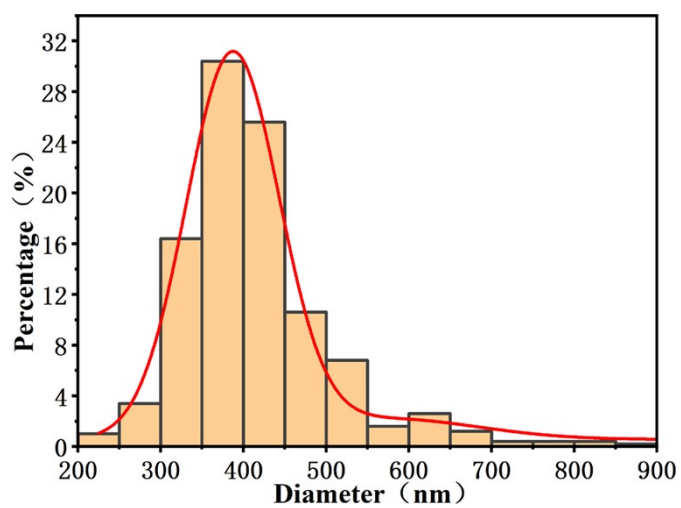

**Figure S9.** The fiber diameter distribution of the inner layer of the sponge.

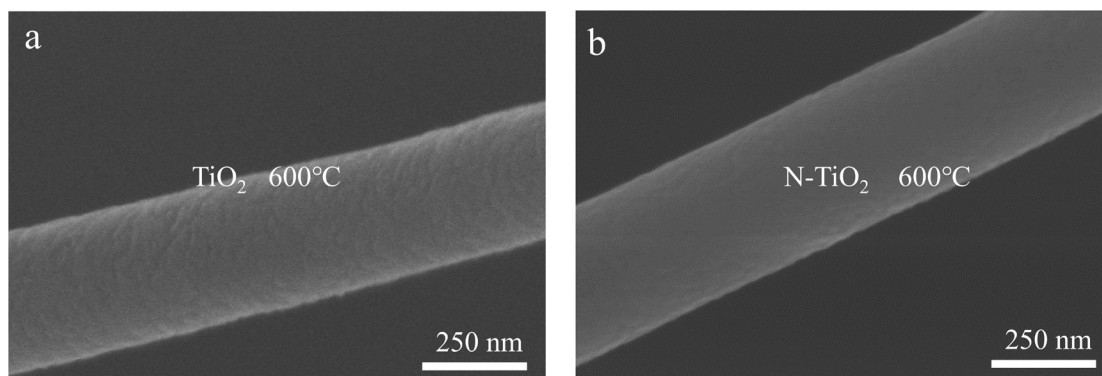

**Figure S10.** SEM images of  $\text{TiO}_2$  and  $\text{N-TiO}_2$  nanofibers after calcination at  $600\text{ }^\circ\text{C}$  for 1h.

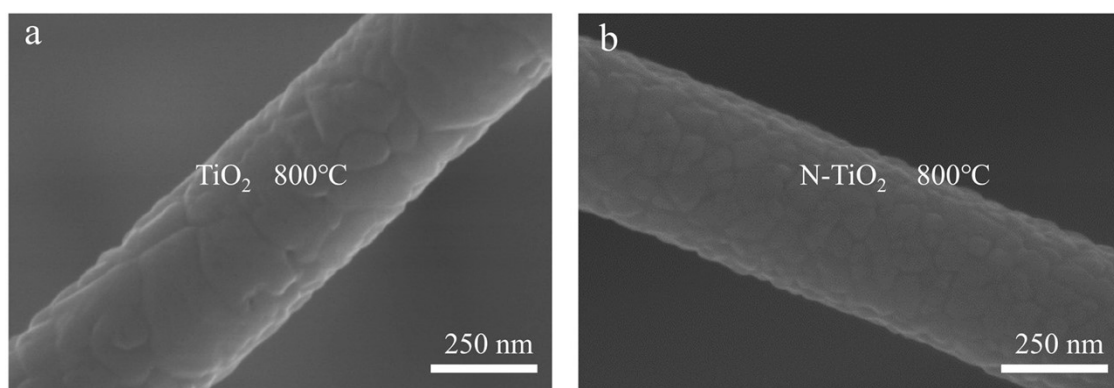

**Figure S11.** SEM images of TiO<sub>2</sub> and N-TiO<sub>2</sub> nanofibers after calcination at 800 °C for 1h.

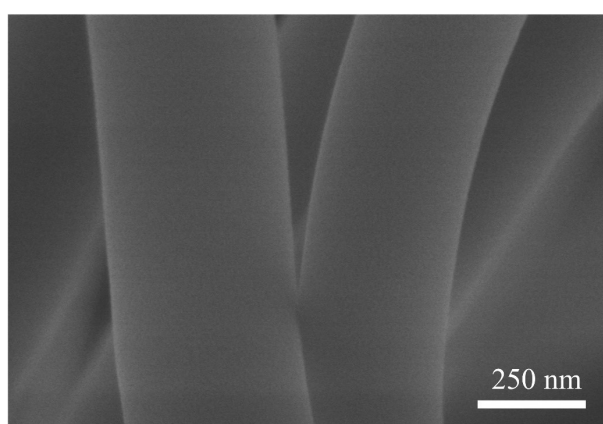

**Figure S12.** SEM image of bonding points between N-TiO<sub>2</sub> nanofibers

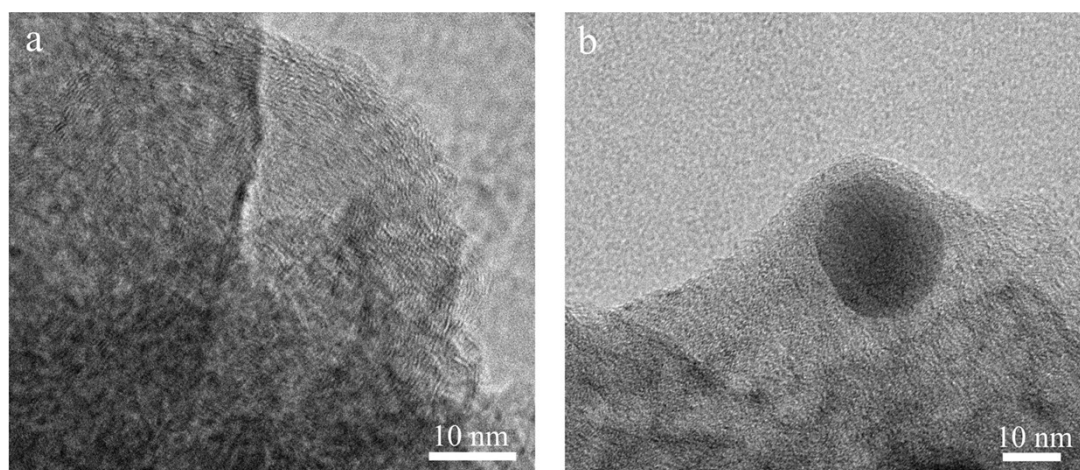

**Figure S13.** TEM images at the fracture site of N-TiO<sub>2</sub> nanofiber.

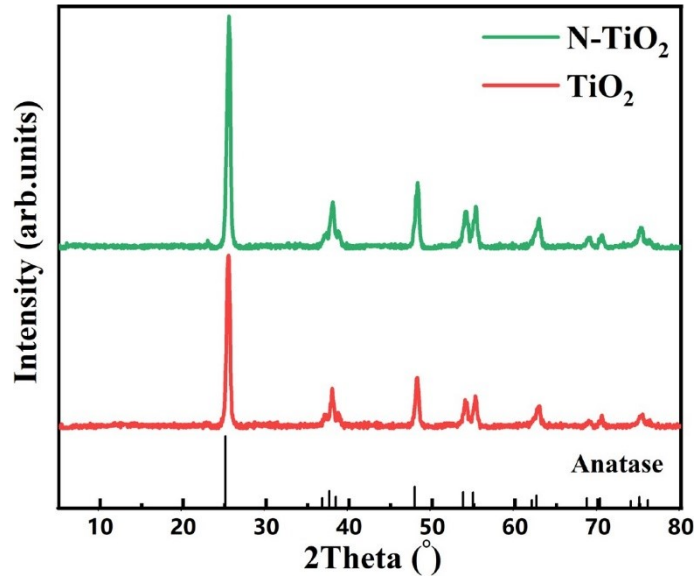

Figure S14. XRD spectra of TiO<sub>2</sub> and N-TiO<sub>2</sub> CNSs.

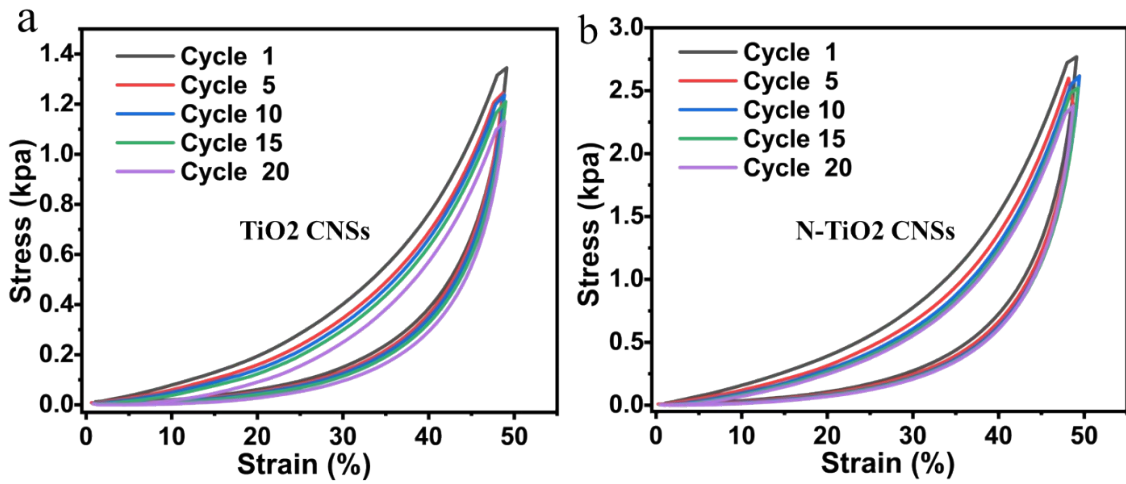

Figure S15. Compression resilience test results of TiO<sub>2</sub> CNSs and N-TiO<sub>2</sub> CNSs with a density of about 15 mg cm<sup>-3</sup>. (a) TiO<sub>2</sub> CNSs. (b) N-TiO<sub>2</sub> CNSs.

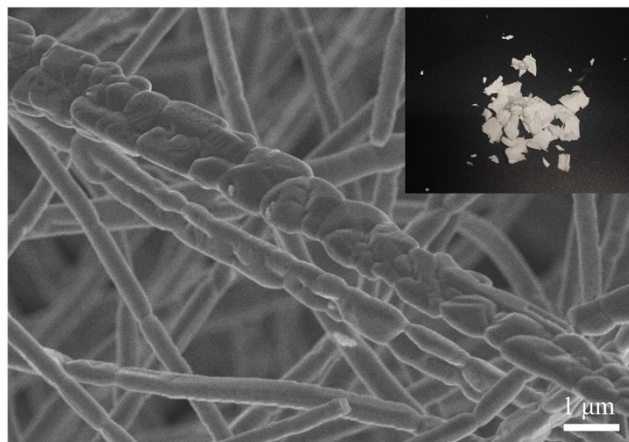

Figure S16. SEM image of N-TiO<sub>2</sub> after calcination at 1000 °C for 1h, the inset is a physical picture.

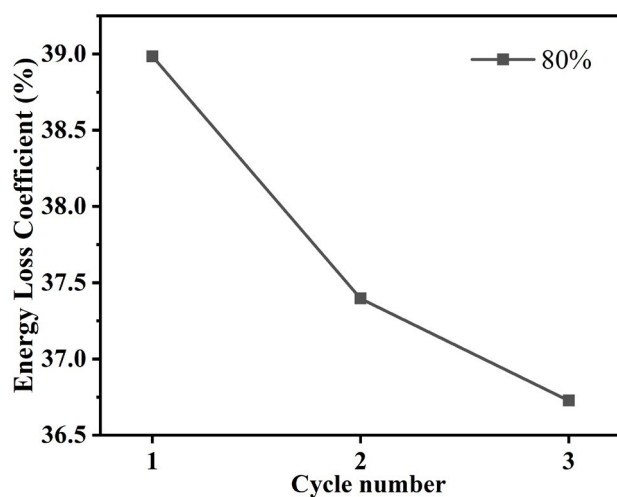

Figure S17. Energy loss coefficient of  $12 \text{ mg cm}^{-3}$  N-TiO<sub>2</sub> CNSs at 80% strain.

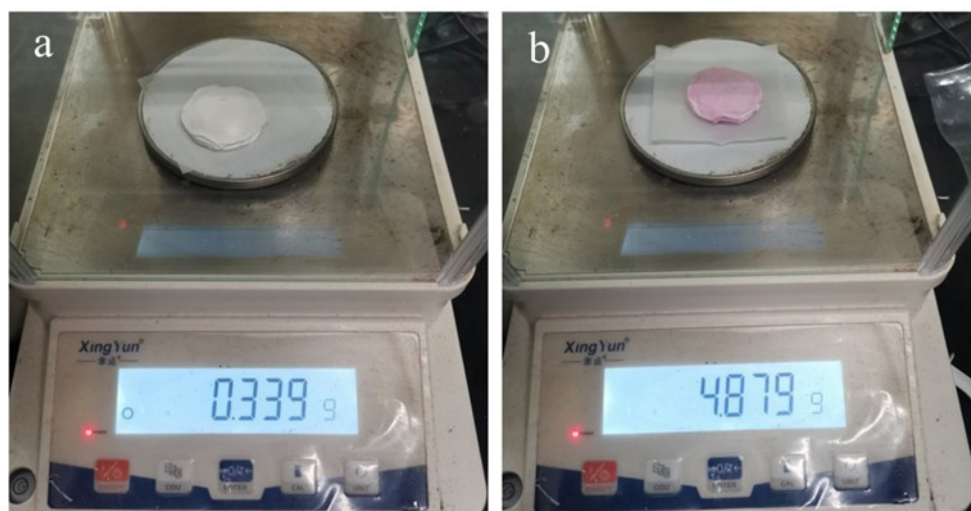

Figure S18. Hydroscopicity of TiO<sub>2</sub> nanofibrous sponge.

### Supplementary Tables

Table S1. Automatic fast surface and porosity tests results

| BJH Pore Size Distribution | Surface Area(m <sup>2</sup> g <sup>-1</sup> ) | Pore volume(cc g <sup>-1</sup> ) |
|----------------------------|-----------------------------------------------|----------------------------------|
| <b>Adsorption</b>          |                                               |                                  |
| N-TiO <sub>2</sub>         | 14.258                                        | 0.038                            |
| TiO <sub>2</sub>           | 16.806                                        | 0.045                            |
| BJH Pore Size Distribution | Surface Area(m <sup>2</sup> g <sup>-1</sup> ) | Pore volume(cc g <sup>-1</sup> ) |
| <b>Desorption</b>          |                                               |                                  |
| N-TiO <sub>2</sub>         | 36.946                                        | 0.049                            |
| TiO <sub>2</sub>           | 39.506                                        | 0.054                            |
